# Supplementary material for: Redesigning the ‘choice architecture’ of hospital prescription charts: a mixed methods study incorporating in situ simulation testing
Source: HighWire-hosted journal article supplement (doi:10.1136/bmjopen-2014-005473), 2014-12-01
Supplement: bmjopen-2014-005473supp_appendix1.pdf [file bmjopen-2014-005473supp_appendix1.pdf]

**Appendix 1: Standards for safe prescribing that completed charts were evaluated against specific criteria**

| <b>Prescribing Standard</b>                                       | <b>Description</b>                                                                                                                                                                                                          |
|-------------------------------------------------------------------|-----------------------------------------------------------------------------------------------------------------------------------------------------------------------------------------------------------------------------|
| Patient details                                                   | Name, ward, hospital number, consultant's name, date of birth, weight must all be stated clearly on the prescription                                                                                                        |
| General prescribing principles                                    | All prescriptions should be signed by the prescriber and, for each signature; the prescriber must print their name and bleep/ contact details. Where applicable the correct dose, frequency and indication should be stated |
| Allergy status                                                    | Both the allergy and type of reaction must be entered. If there is no allergy then this must be clearly stated                                                                                                              |
| Regular medicines                                                 | The dose, route(s) and maximum dose and/or frequency of administration must be stated                                                                                                                                       |
| As required medicines                                             | The dose, route(s) and maximum dose and/or frequency of administration must be stated                                                                                                                                       |
| Antibiotics                                                       | The dose, route(s) and maximum dose and/or frequency of administration must be stated. All anti-infective prescriptions must also have an indication and a stop/review date documented on the prescription date             |
| Adult venous thromboembolism assessment and prevention guidelines | Prescribers should complete all relevant parts of the admission checklist                                                                                                                                                   |
