# Supplementary material for: Redesigning the ‘choice architecture’ of hospital prescription charts: a mixed methods study incorporating in situ simulation testing
Source: HighWire-hosted journal article supplement (doi:10.1136/bmjopen-2014-005473), 2014-12-01
Supplement: bmjopen-2014-005473supp_appendix3.pdf [file bmjopen-2014-005473supp_appendix3.pdf]

**Appendix 3: Analysis of completed prescription charts in patients who were consecutively discharged from one medical and one surgical ward at a London hospital (n=40)**

| Detail                            | Percentage Completed | No of Entries |
|-----------------------------------|----------------------|---------------|
| <b>Basic Patient Details</b>      |                      |               |
| Patient name (n=40)               | 40 (100%)            |               |
| Patient date of birth (n=40)      | 40 (100%)            |               |
| Hospital number (n=40)            | 40 (100%)            |               |
| NHS Number (n=40)                 | 1 (2.5%)             |               |
| Weight (n=40)                     | 10 (25%)             |               |
| Height (n=40)                     | 5 (12.5%)            |               |
| Body Surface Area (n=40)          | 1 (2.5%)             |               |
| Use of addressograph label (n=40) | 15 (37.5%)           |               |
| <b>Hospital Details</b>           |                      |               |
| Ward (n=40)                       | 36 (90%)             |               |
| Consultant (n=40)                 | 27 (67.5%)           |               |
| Junior doctor (n=40)              | 2 (5%)               |               |
| Bleep number (n=40)               | 5 (12.5%)            |               |
| TTA written (n=40)                | 11 (27.5%)           |               |
| EDC screened (n=40)               | 10 (25%)             |               |
| Chart number (n=40)               | 15 (37.5%)           |               |
| Pharmacy cost centre (n=40)       | 4 (10%)              |               |
| Medication on supplementary       | 0 (0%)               |               |

|                                                          |                  |                   |
|----------------------------------------------------------|------------------|-------------------|
| chart (n=40)                                             |                  |                   |
| <b>Allergies</b>                                         |                  |                   |
| No of patients with documented allergies (n=40)          | 10 (25%)         |                   |
| Number of allergies where reaction was documented (n=10) | 3 (30% of total) |                   |
| <b>Once Only Medication</b>                              |                  |                   |
| Number of charts with > 0 entries (n=40)                 | 26 (65%)         |                   |
| Median number of entries                                 |                  | 1.5 (range 0 - 9) |
| <b>Preparations administered by nurse</b>                |                  |                   |
| Number of charts with > 0 entries (n=40)                 | 0 (0%)           |                   |
| Median number of entries                                 |                  | 0                 |
| <b>Medicines Reconciliation</b>                          |                  |                   |
| Number of charts with > 0 entries (n=40)                 | 30 (75%)         |                   |
| Source of medication history detailed (n=40)             | 31 (77.5%)       |                   |
| Checked by pharmacist checked (n=40)                     | 30 (75%)         |                   |
| Multidisciplinary communication box used (n=40)          | 13 (32.5%)       |                   |
| <b>VTE Assessment</b>                                    |                  |                   |

|                                                                  |             |            |
|------------------------------------------------------------------|-------------|------------|
| Risk assessment fully completed (n=40)                           | 0 (0%)      |            |
| Eligibility for prophylaxis confirmed (n=40)                     | 4 (10%)     |            |
| Doctor completing assessment recognisable (n=40)                 | 4 (10%)     |            |
| Anti-embolism stockings prescribed (n=40)                        | 12 (30%)    |            |
| LMWH prescribed (n=40)                                           | 29 (72.5%)  |            |
| Warfarin prescribed (n=40)                                       | 0 (0%)      |            |
| <b>Variable Dose Prescriptions</b>                               |             |            |
| Number of charts with > 0 entries (n=40)                         | 6 (15%)     |            |
| <b>Regular Medications</b>                                       |             |            |
| Number of charts with > 0 entries (n=40)                         | 100 (100%)  |            |
| Total number of individual prescriptions on 40 drug charts - 350 |             |            |
| Longest prescription (characters) - 24                           |             |            |
| Median number of entries                                         |             | 8 (0 - 20) |
| Legible (n=350)                                                  | 328 (93.7%) |            |
| Units written in full (n=350)                                    | 262 (74.9%) |            |
| Start date documented (n=350)                                    | 344 (98.9%) |            |
| Stop date documented (n=350)                                     | 4 (1.14%)   |            |

|                                                       |             |           |
|-------------------------------------------------------|-------------|-----------|
| Identify prescriber (n=350)                           | 37 (10.6%)  |           |
| Completed whether new or continued medication (n=350) | 213 (60.9%) |           |
| <b>Antibiotics</b>                                    |             |           |
| Number of patients who received antibiotics (n=40)    | 18 (45%)    |           |
| Total number of prescriptions (n=40)                  |             |           |
| Documented duration (n=40 prescriptions)              | 8 (20%)     |           |
| Documented indication (n=40 prescriptions)            | 21 (52.5%)  |           |
| <b>As Required Medications</b>                        |             |           |
| Number of charts with > 0 entries (n=40)              | 32 (80%)    |           |
| Total number of prescriptions (n=101)                 |             |           |
| Number Median number of entries                       |             | 2 (0 - 7) |
| Number legible (n=101)                                | 91 (90.1%)  |           |
| Units written in full (n=101)                         | 65 (64.4%)  |           |
| Start date documented (n=101)                         | 99 (98%)    |           |
| Identify prescriber (n=101)                           | 9 (0.089%)  |           |
| Completed whether new or continued medication (n=101) | 9 (0.089%)  |           |

|                                          |            |           |
|------------------------------------------|------------|-----------|
| <b>Oxygen Prescription</b>               |            |           |
| Number of charts with > 0 entries (n=40) | 0 (0%)     |           |
| <b>Insulin Prescription</b>              |            |           |
| Number of charts with > 0 entries (n=40) | 0 (0%)     |           |
| <b>Infusions</b>                         |            |           |
| Number of charts with > 0 entries (n=40) | 23 (57.5%) |           |
| Median number of entries                 |            | 2 (0 - 7) |
| <b>Medicines not administered</b>        |            |           |
| Number of charts with > 0 entries (n=40) | 7 (17.5%)  |           |
